# Supplementary material for: Mapping Small Effect Mutations in Saccharomyces cerevisiae: Impacts of Experimental Design and Mutational Properties
Source: PubMed Central journal article supplement (PMC4455770; doi:10.1534/g3.114.011783), 2014-04-29
Supplement: supp_g3.114.011783_FigureS3.pdf [file supp_g3.114.011783_FigureS3.pdf]

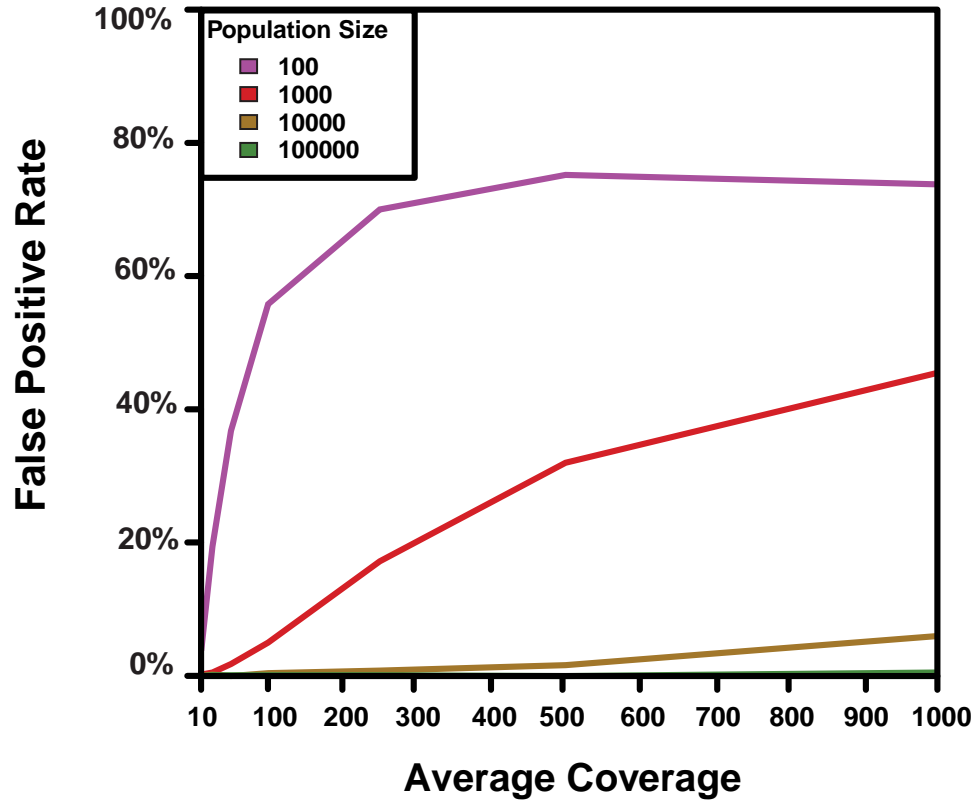

**Figure S3** Statistical power to detect a difference in the frequency of a neutral mutation (mean effect = 0%) between bulks depending on average depth of coverage and population size. This power corresponds to the false discovery rate.
