# Supplementary material for: Mapping Small Effect Mutations in Saccharomyces cerevisiae: Impacts of Experimental Design and Mutational Properties
Source: PubMed Central journal article supplement (PMC4455770; doi:10.1534/g3.114.011783), 2014-04-29
Supplement: supp_g3.114.011783_FigureS8.pdf [file supp_g3.114.011783_FigureS8.pdf]

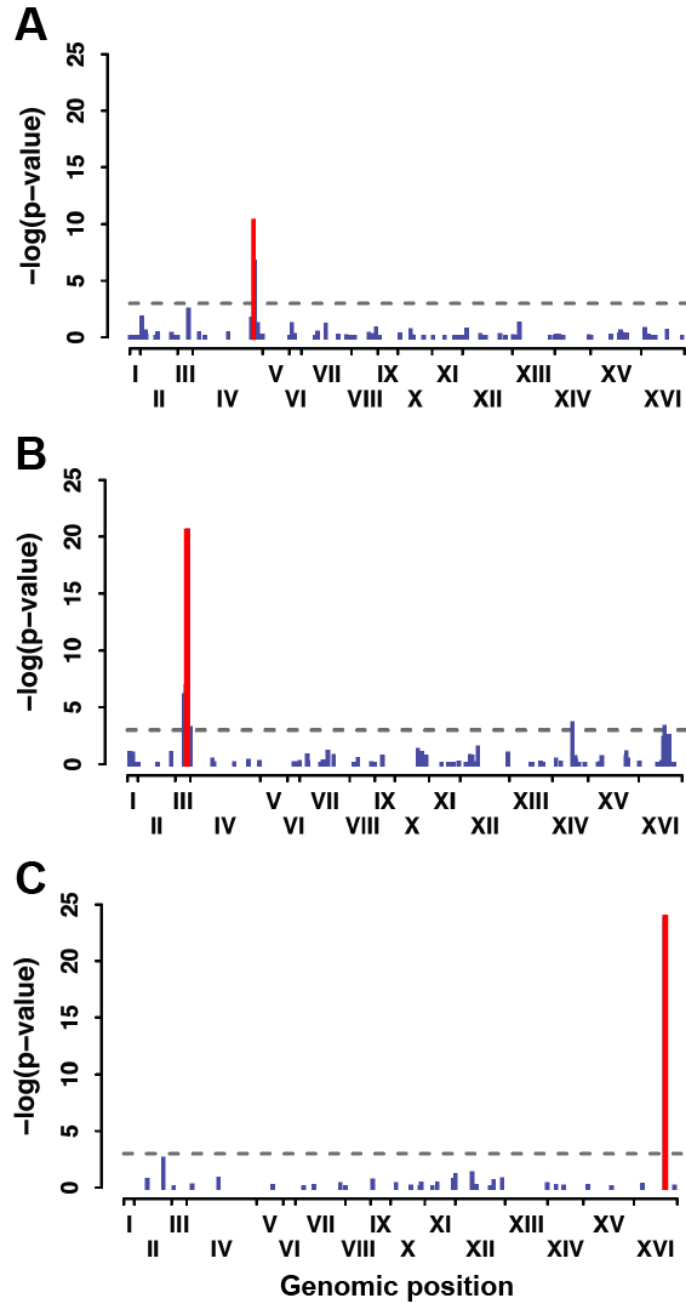

**Figure S8** Tetrad-based mapping identifies the same candidate sites as BSA-seq. Mapping results from a more traditional mapping approach based on tetrad dissection are shown for mutant YPW89 (A), YPW94 (B) and YPW102 (C). Colored bars represent individual EMS-induced mutations with their genomic position represented on x-axis and significance of the difference in allele frequency between low fluorescence and high fluorescence bulks represented on y-axis (negative logarithm of  $P$ -value from G-test). For each mutant, the most significant site identified by BSA-seq is shown in red. Horizontal dotted lines represent a significance threshold of  $\alpha=0.001$ .
